# Supplementary material
Source: Springer Nature journal article supplement (https://www.springermedizin.de/resource/supplementary/13231_2013_94_MOESM2_ESM.pdf/9676534)

**A**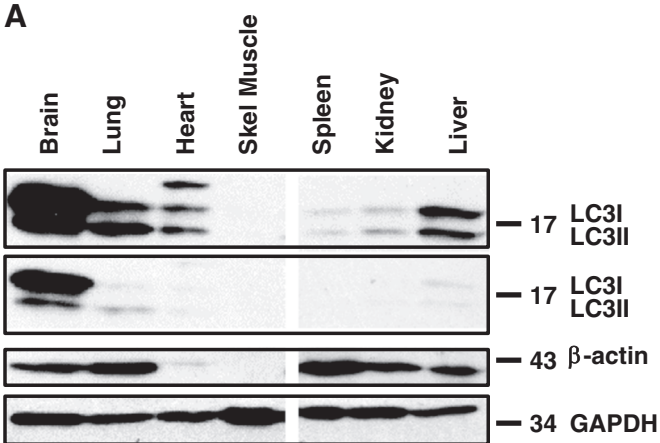**B**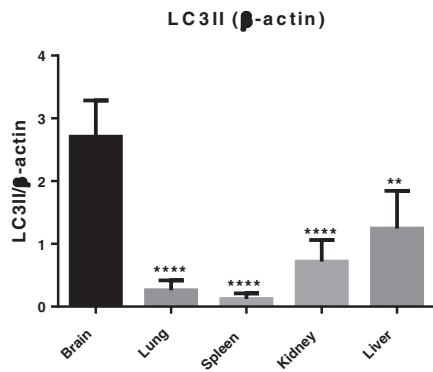**C**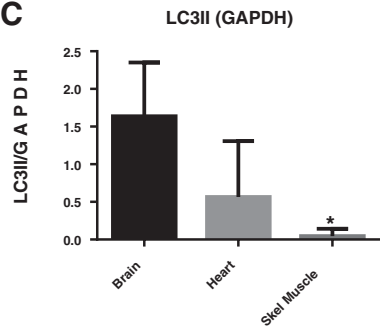**D**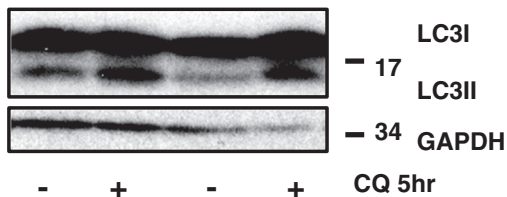**E**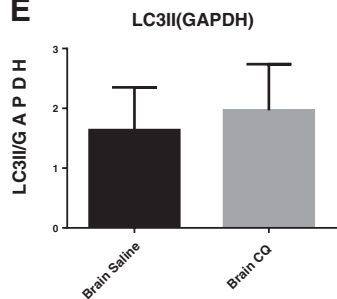

Supplement: MOESM2 [file 9676534]
